# Supplementary material for: Incorporation-limiting mechanisms during nitrogenation of monolayer graphene films in nitrogen flowing afterglows
Source: Royal Society of Chemistry journal article supplement (doi:10.1039/d0nr07827a), 2021-01-01
Supplement: d0nr07827a1.pdf [file d0nr07827a1.pdf]

## Incorporation-limiting mechanisms during nitrogenation of monolayer graphene films in nitrogen flowing afterglows

G. Robert Bigras<sup>1</sup>, R. Martel<sup>2</sup>, L. Stafford<sup>1\*</sup>

<sup>1</sup> Département de Physique, Université de Montréal, Montréal, Québec, CANADA

5 <sup>2</sup> Département de Chimie, Université de Montréal, Montréal, Québec, Canada

\*luc.stafford@umontreal.ca

### SUPPLEMENTARY DATA

#### S1 – PLASMA DIAGNOSTICS

Number densities of key species are extracted using NO titration and line-ratio of particular  
10 spectral bands. NO gas is added to the flowing afterglow and the emission intensity of the NO<sub>β</sub>  
band at 320 nm is followed. monitored. Extinction of the emission occurs when the density of N  
atoms is equal to the density of NO (see **Figure S1**). The titration method allow for the calculation  
of a constant,  $k_{titration}$ , that can be used to link the emission intensity of the 580 nm line to the  
number density of N atoms<sup>1,2</sup>:

15 
$$a I_{580} = k_{titration} [N]^2$$

, where  $I_{580}$  is the emission intensity of the 580 nm line;  $k_{titration}$  is a constant for a given geometry  
and exposure time of the acquisition;  $[N]$  is the number density of atomic nitrogen;  $a$  is the  
coefficient that expresses the transition between the early afterglow and the late afterglow.

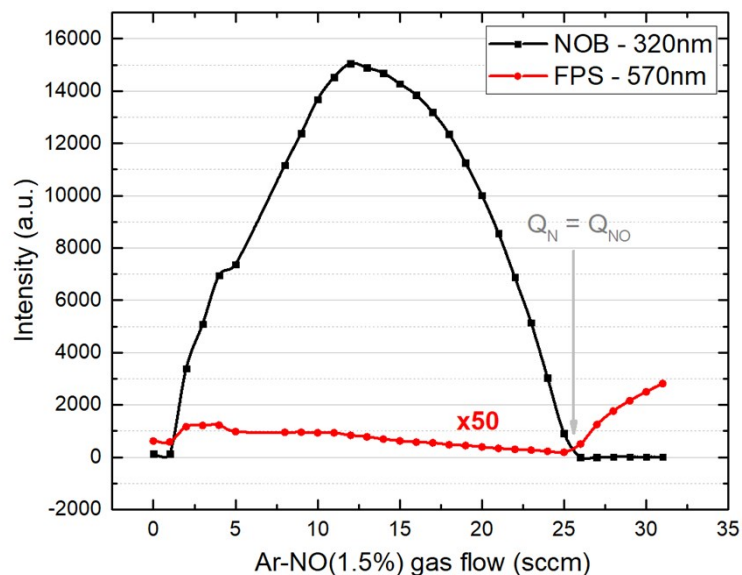

20 **Figure S1** – NO titration. Intensity of the  $\text{NO}_\beta$ -320 nm as a function of Ar-NO gas flow. When the gas flow of NO ( $Q_{\text{NO}}$ ) reaches the gas flow of atomic nitrogen  $Q_{\text{N}}$ , the loss of N is complete and there is extinction of the  $\text{NO}_\beta$  emission.

25 A given set of experimental conditions with NO in the microwave nitrogen flowing afterglow is chosen as a calibration to obtain the vibrational energy distribution function of the early and late afterglows. As shown in Figure S1, by varying the NO concentration in the microwave nitrogen flowing afterglow, a full extinction of the late afterglow can be seen. From this set of data, constraint linear fitting of the distribution is done over the whole set of conditions. All coefficients  
 30 are bound between 0 and 1, and the distribution are normalized. In addition, the distribution of the early afterglow is constrained to an exponential decay, with a vibrational temperature of 0.66 eV. The results are shown in Figure S2a for the vibrational energy distribution and in Figure S2b for the a coefficient as a function of the NO concentration.

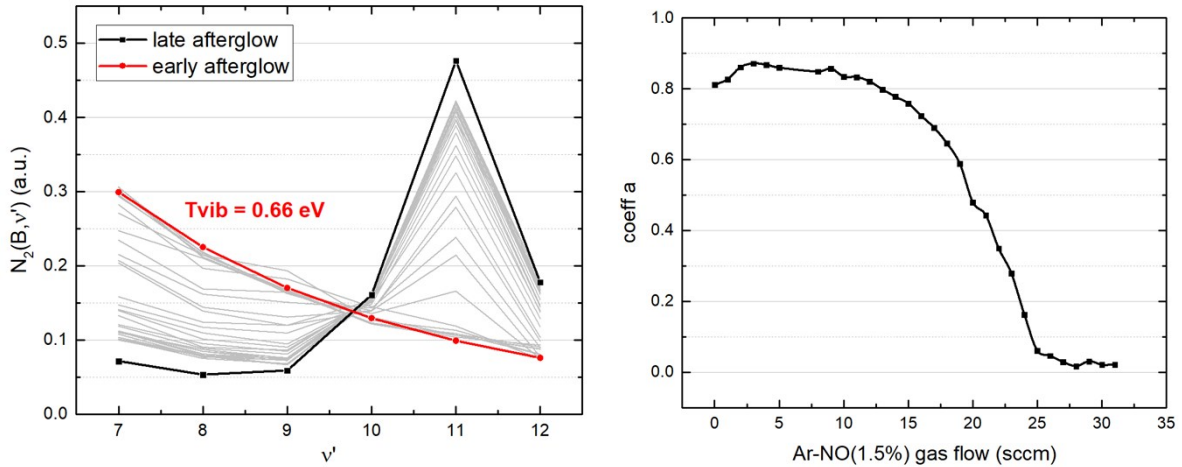

35 **Figure S2** – (a) Evolution of the vibrational energy distribution of the first positive system of  $N_2$  for various concentrations of NO leading to the extinction of the late afterglow. (b) Influence of the NO concentration on the  $a$  coefficient.

40 As for the population of  $N_2(A)$ , it can be obtained from the band ratio <sup>3</sup>:

$$\frac{a I_{580}}{I_{316}} = \frac{A_{580} k_{01} [N_2] [N]^2 / (v_{27} + k_{02} [N_2])}{A_{316} k_{03} [N_2(A)]^2 / (v_{30} + k_{26} [N_2])}$$

**Reaction**

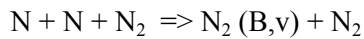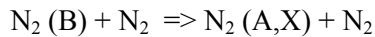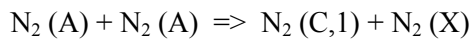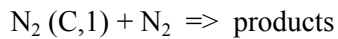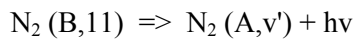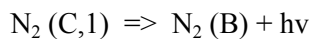

**Rate constant**

$k_{01} = 4.4e-34 ; \text{cm}^6\text{s}^{-1}$

$k_{02} = 3e-11 ; \text{cm}^3\text{s}^{-1}$

$k_{03} = 4.1e-11 ; \text{cm}^3\text{s}^{-1}$

$k_{26} = 3e-11 ; \text{cm}^3\text{s}^{-1}$

$v_{27} = 2e5 ; \text{s}^{-1}$

$v_{30} = 2.7e7 ; \text{s}^{-1}$

$A_{580} = 7.8e4 ; \text{s}^{-1}$

$A_{316} = 1.3e7 ; \text{s}^{-1}$

45 S2 – XPS ANALYSIS

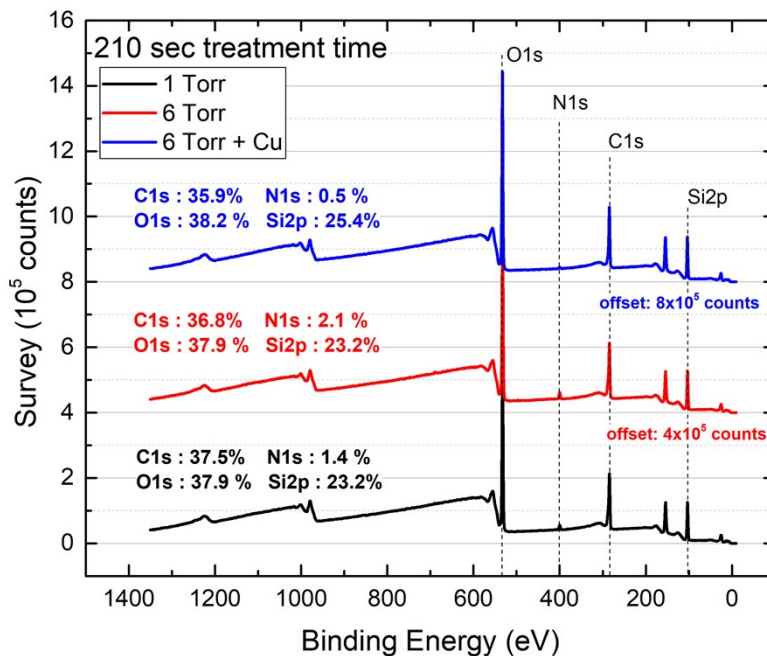

Figure S3– Survey spectra for the 210-treatment time for all conditions.

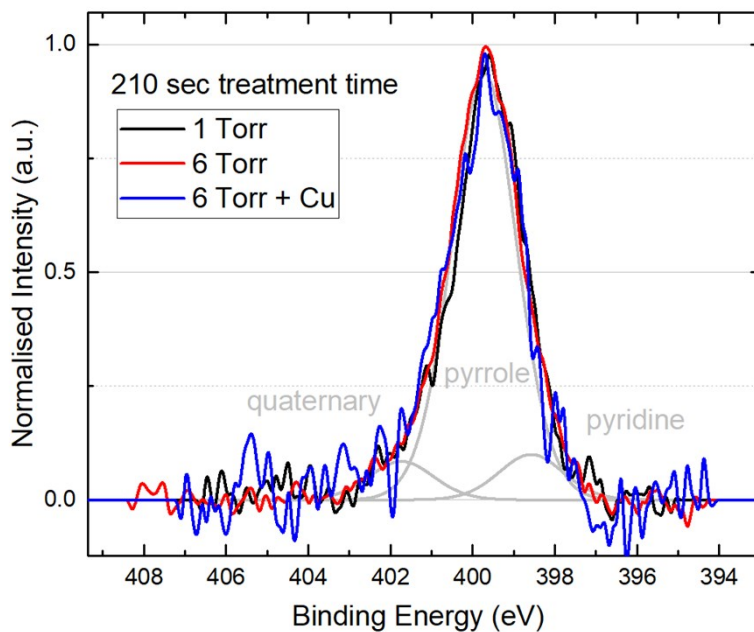

**Figure S4** – Normalized high-resolution N1s XPS spectra for the 210-treatment time for all studied conditions.

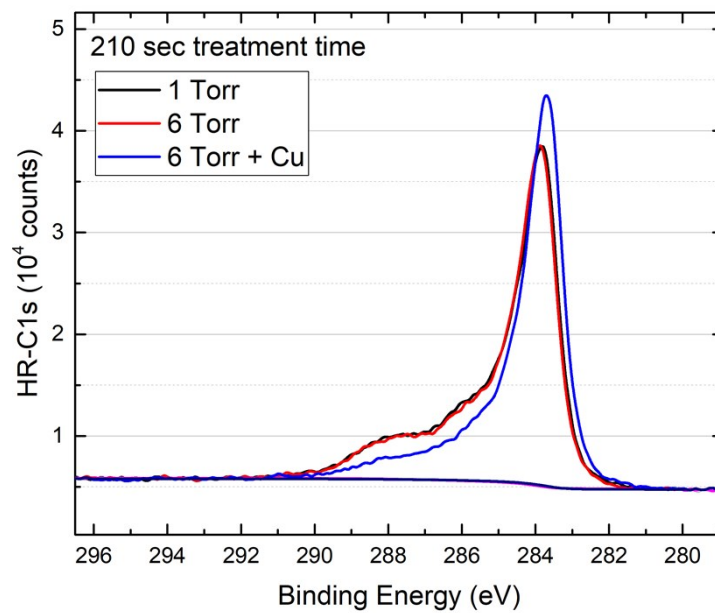

**Figure S5** – High resolution C1s spectra for the 210-treatment time for all conditions.

## 55 REFERENCES

- 1 H. Zerrouki, A. Ricard and J. P. Sarrette, Determination of N and O-atoms and N<sub>2</sub> (A) metastable molecule densities in the afterglows of N<sub>2</sub>-H<sub>2</sub>, Ar-N<sub>2</sub>-H<sub>2</sub> and Ar-N<sub>2</sub>-O<sub>2</sub> microwave discharges, *Contrib. to Plasma Phys.*, 2014, **54**, 827–837.
- 2 M. K. Boudam, B. Saoudi, M. Moisan and A. Ricard, Characterization of the flowing afterglows of an N<sub>2</sub>–O<sub>2</sub> reduced-pressure discharge: setting the operating conditions to achieve a dominant late afterglow and correlating the NO β UV intensity variation with the N and O atom densities, *J. Phys. D. Appl. Phys.*, 2007, **40**, 1694–1711.
- 3 A. Ricard, S. Oh and V. Guerra, Line-ratio determination of atomic oxygen and N<sub>2</sub> (A) metastable absolute densities in an RF nitrogen late afterglow, *Plasma Sources Sci. Technol.*, 2013, **22**, 035009.
